# Supplementary material for: Availability of integrated family planning services in HIV care and support sites in sub-Saharan Africa: a secondary analysis of national health facility surveys
Source: PubMed Central journal article supplement (PMC6538552; doi:10.1186/s12978-019-0713-x), 2019-05-29
Supplement: 12978_2019_713_MOESM2_ESM.pdf [file 12978_2019_713_MOESM2_ESM.pdf]

# Disponibilidade de serviços integrados de planeamento familiar em instituições de apoio e cuidados de VIH na África Subariana: uma análise secundária dos inquéritos nacionais sobre instalações de saúde

Mufaro Kanyangara<sup>1\*</sup>, Kwame Sakyi<sup>2</sup>, Amos Laar<sup>3</sup>

<sup>1</sup>Department of International Health, Johns Hopkins Bloomberg School of Public Health, Baltimore, Maryland, USA

<sup>2</sup>Department of Public and Environmental Wellness, School of Health Sciences, Oakland University, Rochester, Michigan, USA

<sup>3</sup>Department of Population, Family, and Reproductive Health, School of Public Health, College of Health Sciences, University of Ghana, Accra, Ghana.

\* Autor correspondente: Mufaro Kanyangara, Department of International Health, Johns Hopkins Bloomberg School of Public Health, 615 N. Wolfe Street, Baltimore, MD, USA. Telephone: 410-502-4561. Email: [mkanyan1@jhu.edu](mailto:mkanyan1@jhu.edu)

KS: [ksakyi@oakland.edu](mailto:ksakyi@oakland.edu)

AL: [alaar@ug.edu.gh](mailto:alaar@ug.edu.gh)

## Resumo

**Introdução:** Integrar serviços de planeamento familiar (PF) com programas de tratamento e cuidados de VIH é uma estratégia para aumentar a prestação dos serviços de PF e impedir gravidezes indesejadas entre mulheres que vivem com o VIH. Contudo, pouco se sabe sobre a disponibilidade dos serviços de PF nas instalações de saúde que fornecem serviços do VIH em toda a África Subariana. Neste estudo, a disponibilidade dos serviços integrados de PF foi avaliada, bem como os fatores associados a instituições de apoio e cuidados de VIH em toda a África Subariana.

**Métodos:** Foi realizada uma análise secundária dos dados nacionais ao nível das instalações, utilizando os inquéritos Service Availability and Readiness Assessments (SARA) e Service Provision Assessments (SPA) em 10 países da África Subariana entre 2012 e 2015. Também foram utilizados seis indicadores que refletem a estrutura e o processo dos cuidados essenciais para a prestação dos serviços de PF nas instituições de apoio e cuidados de VIH para definir o resultado de interesse, ou seja, a disponibilidade no local de serviços

integrados de PF. Uma regressão logística multivariada foi utilizada para explorar as características a nível das instalações associadas ao resultado.

**Resultados:** Entre as 3161 instalações de saúde que fornecem serviços de apoio e cuidados de VIH, a maioria referiu que também oferece serviços de PF no mesmo local. A disponibilidade dos três métodos de PF foi superior à disponibilidade de diretrizes e formação de pessoal no âmbito do PF. A disponibilidade no local de serviços integrados de PF variou entre 10% e 61%. Os resultados da regressão logística multivariada indicam que a probabilidade de ter serviços integrados de PF disponíveis no local foi mais elevada nas instalações de apoio e cuidados de VIH geridas pelo governo, classificadas como um centro de cuidados de nível superior que fornece serviços para PTMF, cuidados pré-natais e cirurgia básica.

**Conclusões:** Os resultados indicam que existem insuficiências significativas relativamente à preparação das instalações de apoio e cuidados de VIH para fornecer serviços integrados de PF no local. São necessárias novas iniciativas para dar resposta a estes obstáculos ao nível de oferta e assegurar que os serviços integrados de PF e VIH satisfazem as necessidades únicas dos utentes com VIH.

**Palavras-chave:** VIH, planeamento familiar, África Subariana, inquéritos sobre instalações de saúde

### **Sobre este suplemento**

Este artigo foi publicado como parte da revista científica *Reproductive Health*, Volume 16, Suplemento 1, 2019: Integração Eficaz dos Serviços de Saúde Sexual e Reprodutiva e de Prevenção, Cuidados e Tratamento do VIH na África Subariana: Onde estão as provas da implementação do programa?

O suplemento foi publicado como uma colaboração entre as revistas científicas *Reproductive Health* e *BMC Public Health*. O conteúdo integral, incluindo as versões em francês, português e inglês, estão disponíveis online:

<https://bmcpublichealth.biomedcentral.com/articles/supplements/volume-19-supplement-1>

e

<https://reproductive-health-journal.biomedcentral.com/articles/supplements/volume-16-supplement-1>
